# Supplementary material
Source: publisher figshare collection journal article supplement (https://acs.figshare.com/ndownloader/files/4636849)
Supplement: Supplementary file 1 [file 4636849]

## Supporting Information

### Three New Cu-Azido Polymers and Their Systematic Inter Conversion: Role of the Amount of the Blocking Amine on the Structural Diversity and Magnetic Behavior

Kartik Chandra Mondal and Partha Sarathi Mukherjee\*

*Department of Inorganic and Physical Chemistry, Indian Institute of Science, Bangalore-*

*560012, India. Fax: 91-80-23601552; Tel: 91-80-22933352*

*E-mail: psm@ipc.iisc.ernet.in*

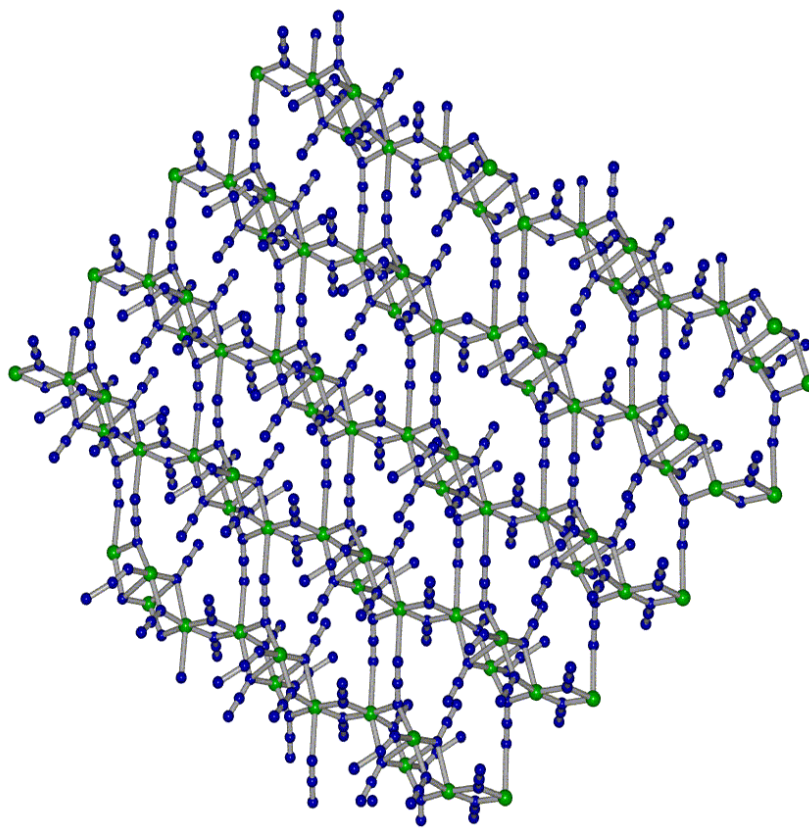

**Fig. S1:** View of the 2D sheet formed by the linking of the rail-road chain by 1,1,3 azido in complex-**1**.

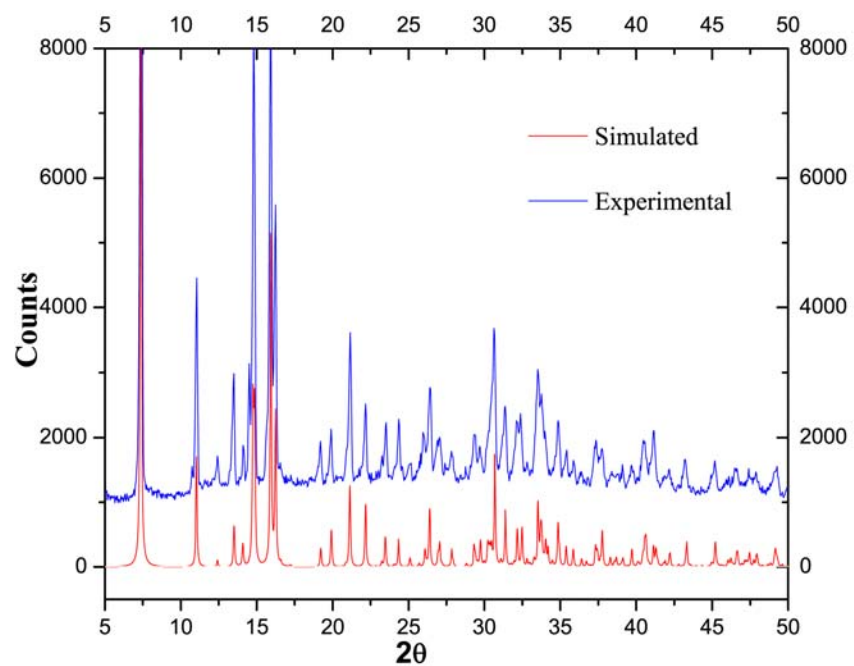

**Fig. S2:** Powder XRD pattern of the complex-1.

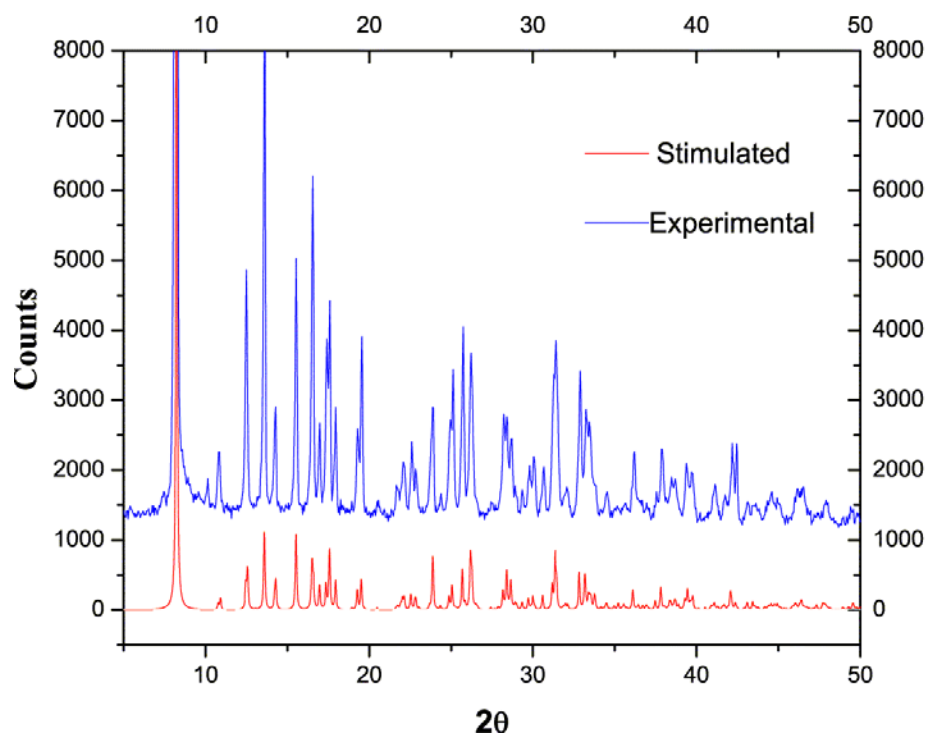

**Fig. S3:** Powder XRD pattern of the complex-2.

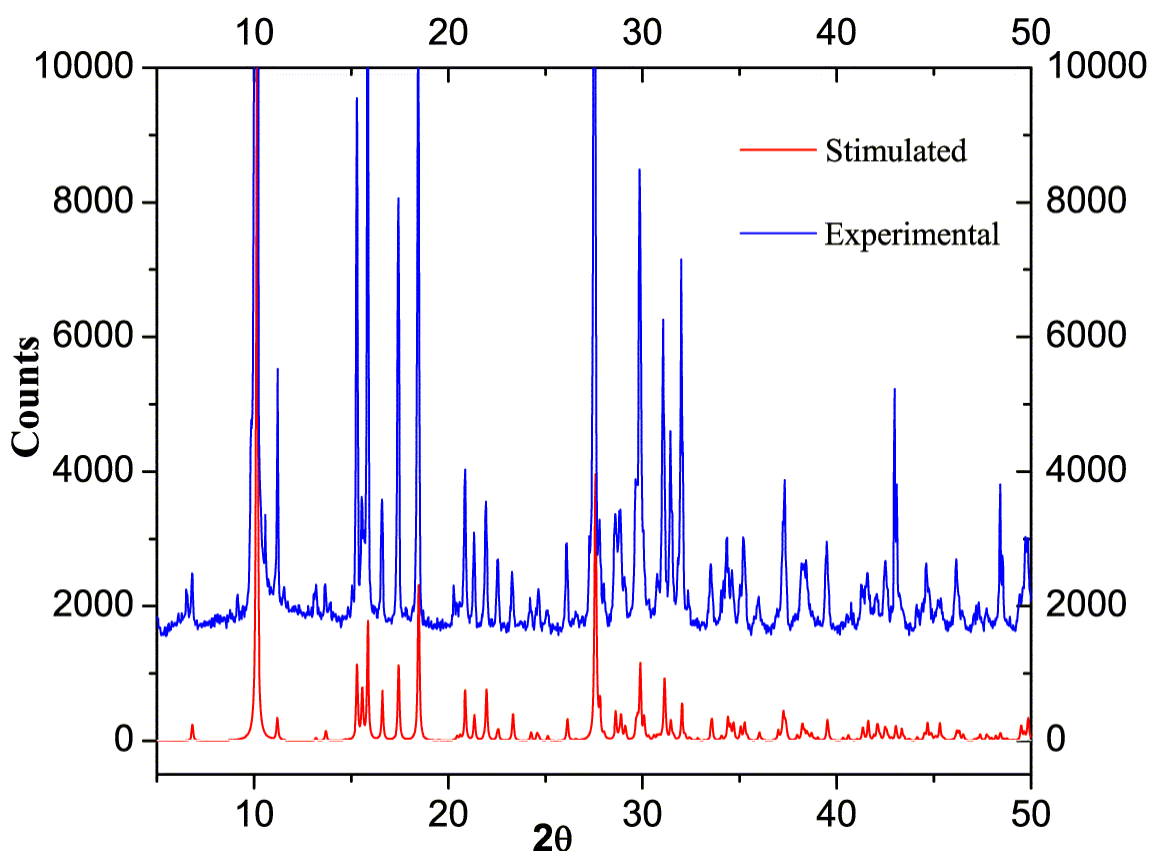

**Fig. S4:** Powder XRD pattern of the complex-3.

Magnetic analysis of **1**:

Since the main magnetic core (1D rail road core) of the complex **1** is nothing but a repetition of defect biscubane unit doubly connected by end-on azido group, thus Heisenberg spin Hamiltonian of the main magnetic unit can be written as

$$\mathbf{H} = -2J_1(\mathbf{S}_1 \cdot \mathbf{S}_2 + \mathbf{S}_3 \cdot \mathbf{S}_4 + \mathbf{S}_1 \cdot \mathbf{S}_3 + \mathbf{S}_2 \cdot \mathbf{S}_4) - 2J_2 \mathbf{S}_2 \cdot \mathbf{S}_3 - 2J_3 (\mathbf{S}_1 \cdot \mathbf{S}_4)$$

The molar magnetic susceptibility per four Cu(II) ion can be written as equation –1<sup>1-2</sup> by applying Kambe's vector coupling method and the van Vleck equation.  $J_n$  are exchange coupling parameters (as shown in the following scheme).

$$\chi_M^{cluster} = \frac{N_A g^2 \mu_B^2}{2kT} \frac{A}{B} \dots\dots\dots(1)$$

Where A = [5exp(2J<sub>1</sub>/kT)+ exp(-2J<sub>2</sub>/kT)+ exp(-2J<sub>3</sub>/kT)+ exp(-2J<sub>1</sub>/kT)]

B = [5exp(2J<sub>1</sub>/kT)+ 4exp(-2J<sub>2</sub>/kT)+ 3exp(-2J<sub>3</sub>/kT)+ exp{-2(J<sub>1</sub>+J<sub>3</sub>)/kT}  
+ 3exp(-2J<sub>1</sub>/kT)+ exp(-4J<sub>1</sub>/kT)]

$$\chi_M^{inter-clust} = \frac{1}{\frac{1}{\chi_M^{cluster}} - \frac{2ZJ'}{N_A g^2 \mu_B^2}} \dots\dots(Y)$$

Molecular field approximation was used to determine the inter-cluster interaction.

Interaction between Cu(1) & Cu(2), Cu(1) & Cu(2\*), Cu(1\*) & Cu(2), Cu(1\*) & Cu(2)  
= J<sub>1</sub>, Cu(2) & Cu(2\*) = J<sub>2</sub>, Cu(1) & Cu(1\*) = J<sub>3</sub>

Where Cu(1\*) = Cu(4) & Cu(2\*) = Cu(3) are assumed for magnetic model

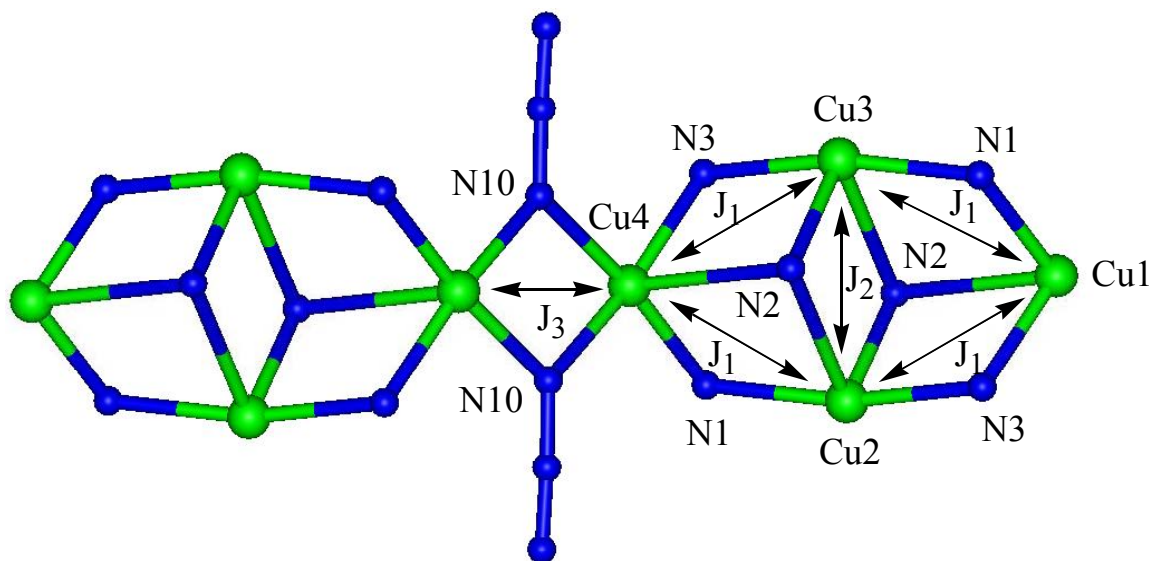

**Scheme-S1:** Magnetic model for the basic unit of complex-1.

The experimental data ( $\chi_M$  per four Cu(II) vs T) was fitted to equation (y)<sup>1</sup> to give  $J_1 = +22.828 \text{ cm}^{-1}$ ,  $J_2 = +23.111 \text{ cm}^{-1}$ ,  $J_3 = +22.914 \text{ cm}^{-1}$  and  $ZJ' = 3.279$  ( $g = 2.07$ ) with the agreement factor  $R = 1 \times 10^{-6}$  gave the best fit.

All the fittings considering the above models led to the conclusion that coupling between two adjacent Cu(2) centers through N(2) is ferromagnetic as bond angle [Cu(2)-N(2)-Cu(2\*) = 92.2°] are close to 90°, Cu(2)-Cu(2\*) and Cu-N bond distances are Cu(2)-Cu(2\*) = 3.297 Å, Cu(2)-N(2) = 1.989 Å, & Cu(2\*)-N(2) = 2.554 Å respectively, the coupling between two adjacent Cu(1) and Cu(2) within the biscubane unit through N(1) and N(3) is also ferromagnetic as average coupling bond angles [Cu(1)-N(2)-Cu(2\*) = 94.03°, Cu(1)-N(1)-Cu(2) = 111.87° & Cu(1)-N(2)-Cu(2) = 83.18°, Cu(1)-N(3)-Cu(2) = 113.22°] are less than 106° and bond distances are Cu(1)-N(1) = 1.976 Å, Cu(2)-N(1) = 2.015 Å, Cu(1)-N(3) = 2.007 Å, Cu(2)-N(3) = 2.016 Å, Cu(1)-Cu(2\*) = 3.307 Å & Cu(1)-Cu(2) = 3.358 Å. Moreover inter biscubane coupling between Cu(1) and Cu(1\*) through N(10) is ferromagnetic as Cu(1)-N(10)-Cu(1\*) bond angle (101.91°) is less than 106° and Cu(1)-Cu(1\*) distance is 3.087 Å while interaction between adjacent 1D rail road chain through  $\mu_{1,3}$ -azido bridge is weakly antiferromagnetic as the inter chain separations are Cu(1)-Cu(1\*) = 5.558 Å & Cu(1)-Cu(2) = 6.6318 Å. Thus it can be concluded that ferromagnetically coupled 1D rail road chain antiferromagnetically couples with adjacent 1D rail road through  $\mu_{1,3}$ -azido bridge and this honey comb like 2D core couples antiferromagnetically to  $\{\text{Cu}^{\text{II}}(3)(\text{LL})_2\}^{2+}$  ions through cis-  $\mu_{1,3}$ -azido bridge [Cu(2)-Cu(3) = 6.275 Å, Cu(2)-N(11) = 1.967 Å, Cu(3)-N(15) = 2.228 Å] and that's why complex **1** shows dominant ferromagnetic coupling in the temperature range 300K to

7.93K while below which antiferromagnetic coupling becomes dominant because of antiferromagnetic coupling between 1D inter rail road chain.

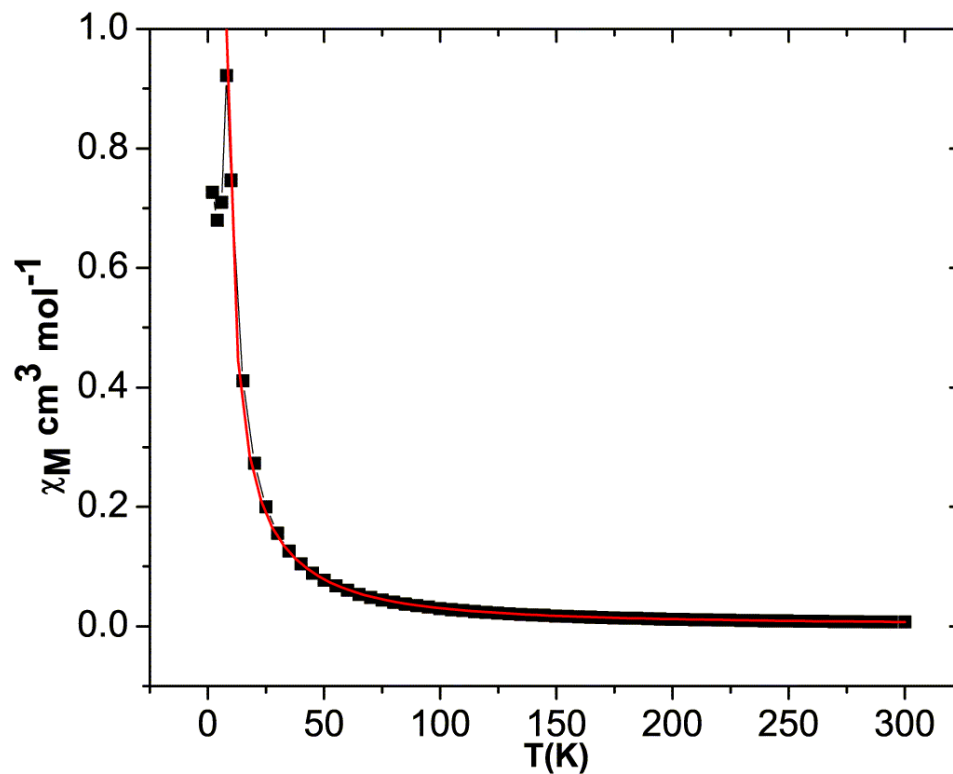

**Fig. S5:** Plots of  $\chi_M$  vs.  $T$  (8-300K) and  $\chi_M T$  vs.  $T$  (inset) of complex **1** in the temperature range 2-300K. The red line indicates the fitting.

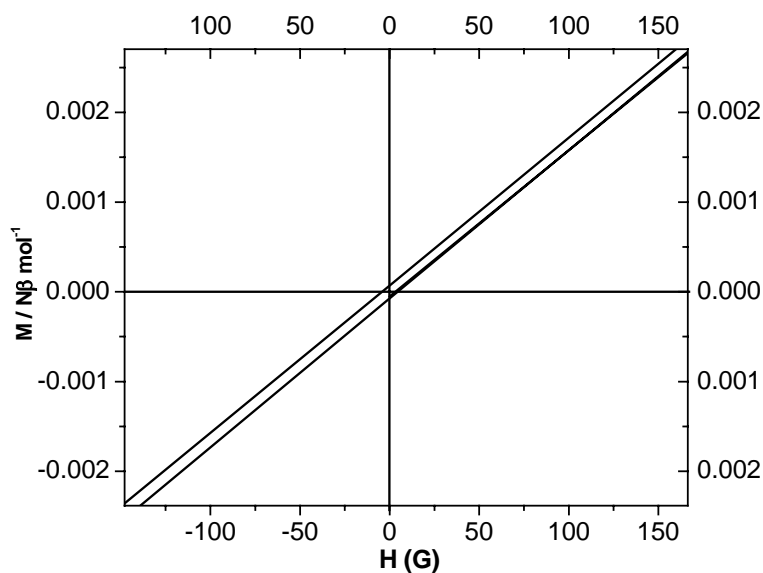

**Fig. S6:**  $M$  vs  $H$  plot at very low field range for **1** to show a very weak loop.

#### References:

1. (a) Lui, T.-F.; Sun, H.-L.; Gao, S.; Zhang, S.-W.; Lau, T.-C. *Inorg. Chem.* **2003**, *42*, 2003. (b) Li, D.-F.; Zheng, L.-m.; Wang, X.-Y.; Haung, J.; Gao, S.; Tang, W.-X. *Chem. Mater.* **2003**, *15*, 2094-2098.
2. (a) Colacio, E.; Domínguez-Vera, J. M.; Ghazi, M.; Kivekäs, R.; Lloret, F.; Moreno, J. M.; Stoeckli-Evans, H. *Chem. Commun.* **1999**, 987. (b) Hernández, M.; Lloret, F.; Ruiz-Pérez, C.; Julve, M. *Inorg. Chem.* **1998**, *37*, 4131.
